# Supplementary material for: KONAGAbase: a genomic and transcriptomic database for the diamondback moth, Plutella xylostella
Source: PubMed Central journal article supplement (PMC3711893; doi:10.1186/1471-2164-14-464), 2013-07-09

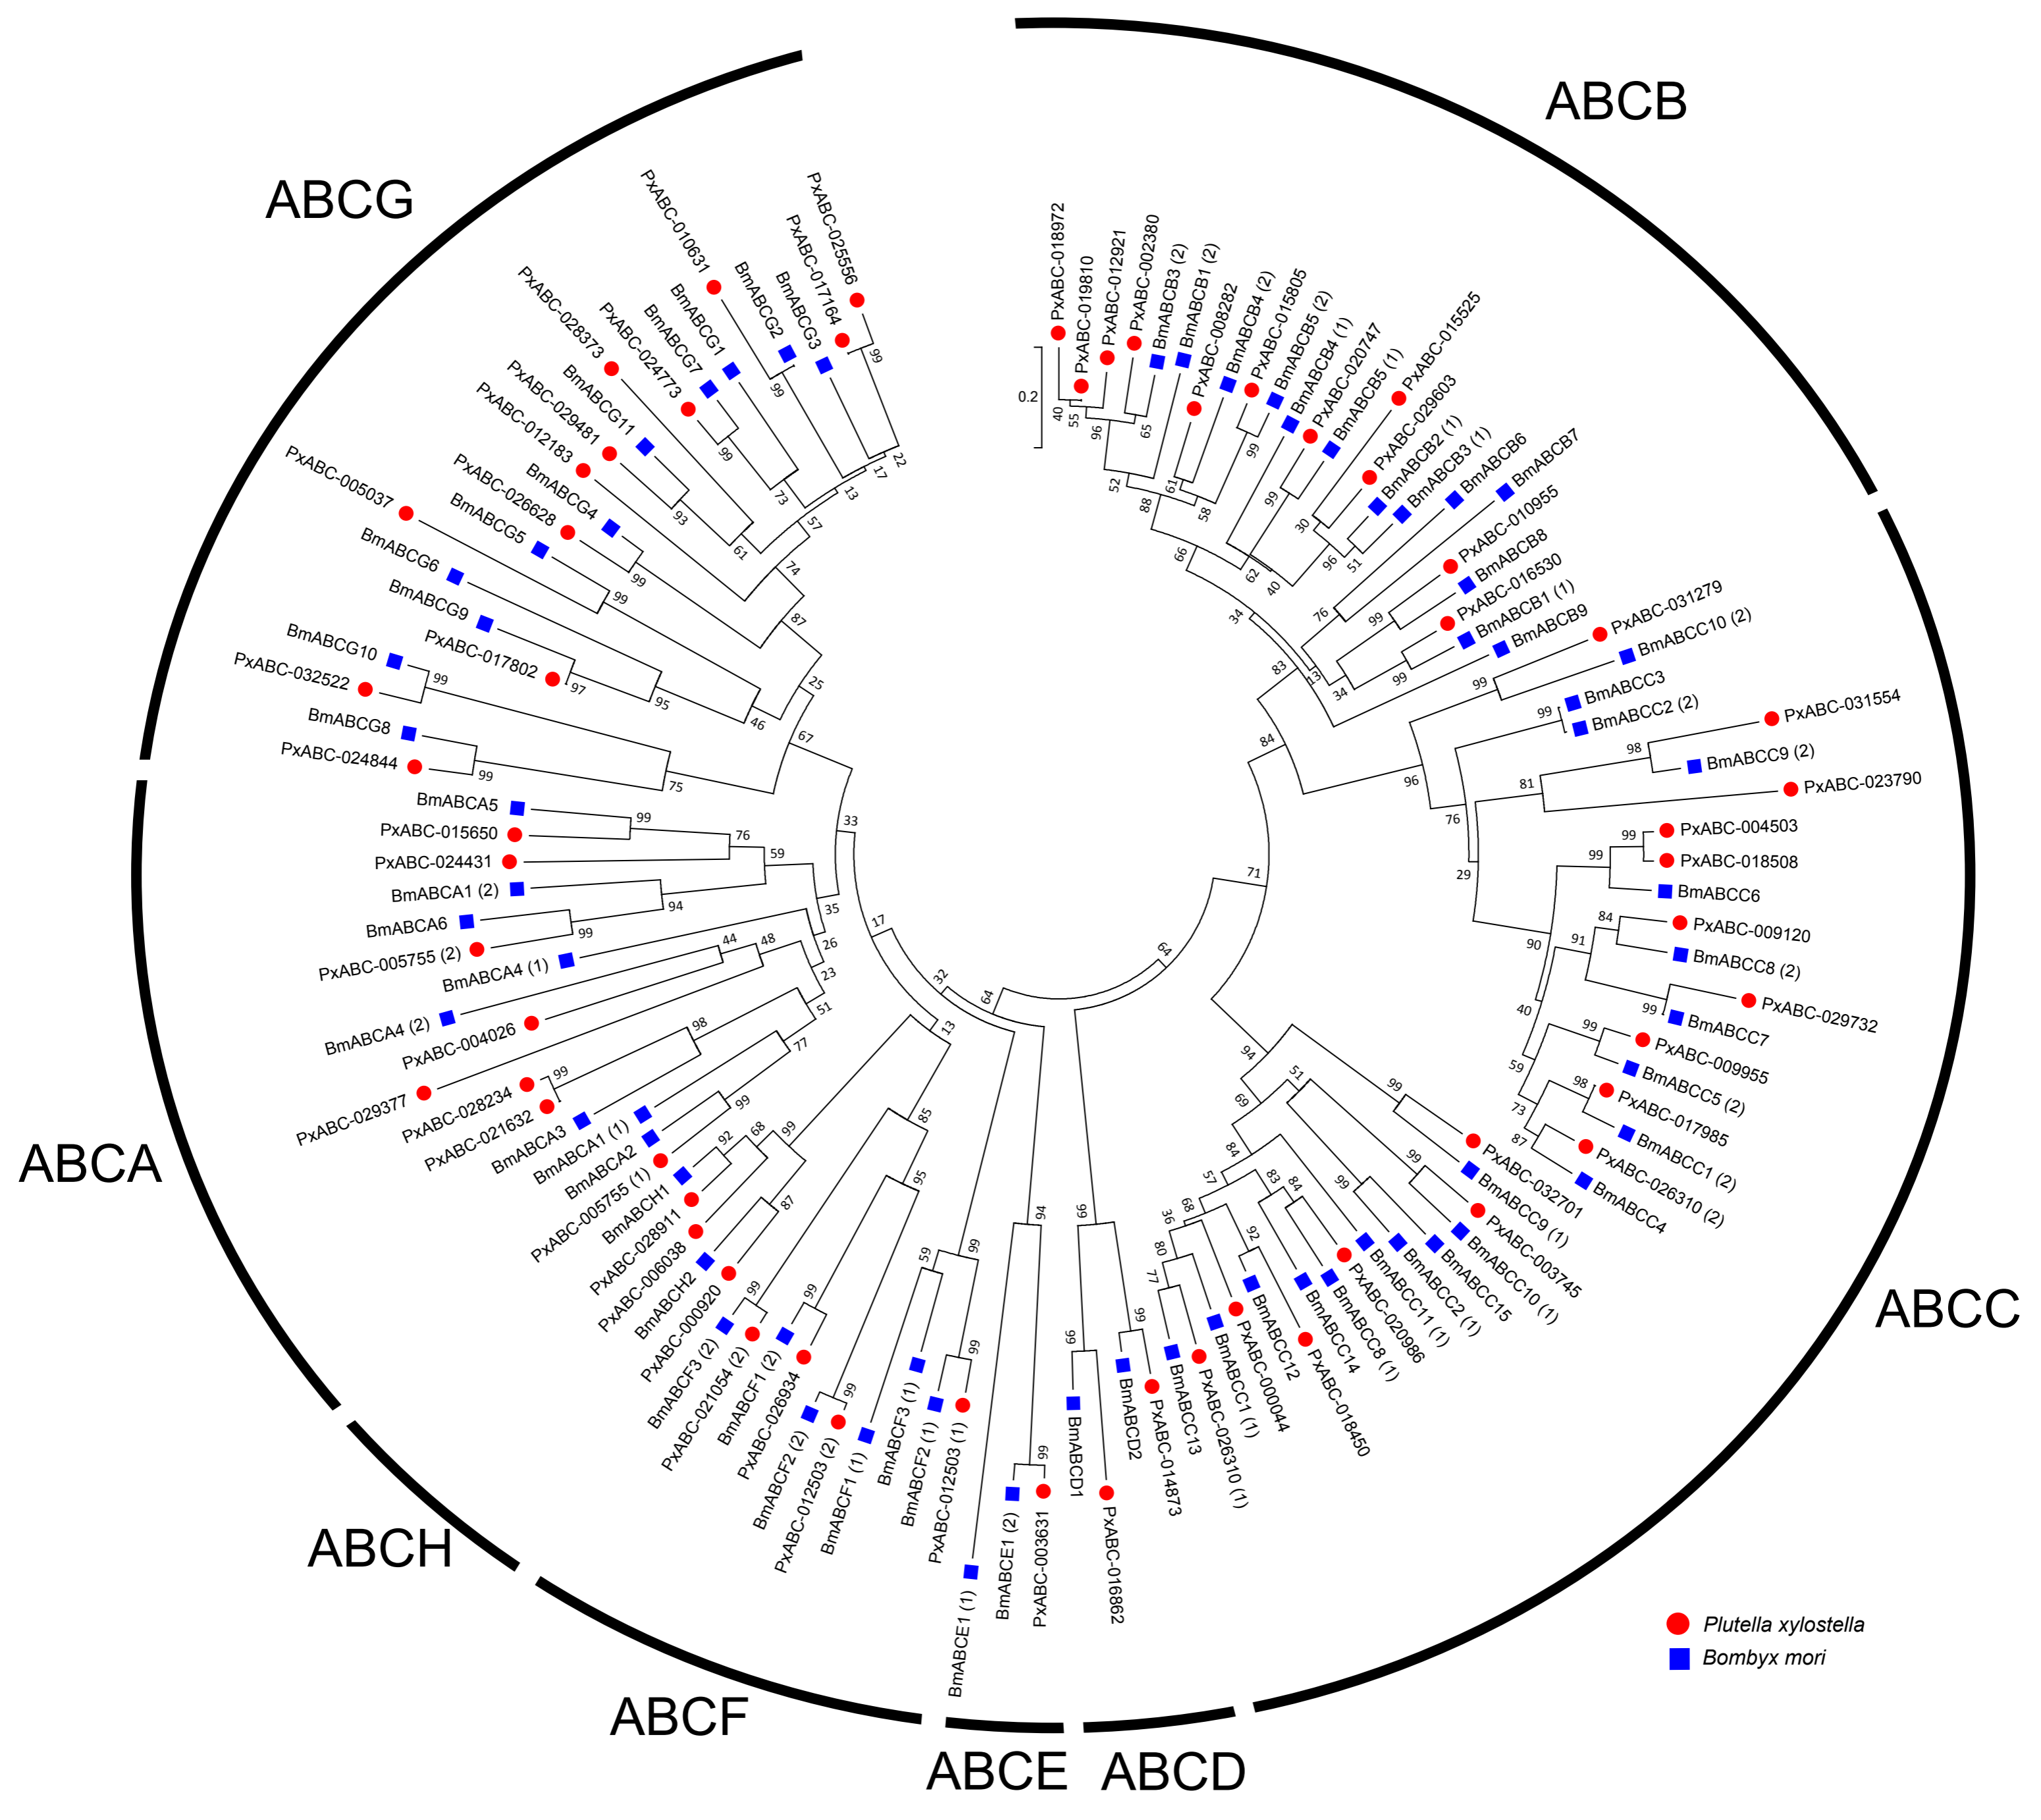

Supplement: 1471-2164-14-464-S3.pdf [file 1471-2164-14-464-S3.pdf]
